# Supplementary material for: BED Estimates of HIV Incidence: Resolving the Differences, Making Things Simpler
Source: PLoS One. 2012 Jan 3;7(1):e29736. doi: 10.1371/journal.pone.0029736 (PMC3250478; doi:10.1371/journal.pone.0029736)
Supplement: Supporting Information S1 — (DOC) [file pone.0029736.s001.doc]

**Supporting Information**

***Adjustment for clients who test “recent” by BED but have actually been HIV positive for longer than a prescribed cut-off time T***

The uncorrected estimate of the risk of becoming infected with HIV over time *T* is given (see main text) by:

(1)

Where *N* is the number testing HIV negative, *R* the number, among *P* HIV positive cases, that also test recent by BED, *r0* = *R/T* is a first estimate of the number who have seroconverted in the previous time *T*, and *T* is a (dimensionless) proportion of *T*.

But seroconverters can be separated into two mutually exclusive sets: i) those who seroconverted in the previous time *T*; ii) those who have been HIV positive for > *T*. A first estimate, of the number who have been HIV positive for time > *T* is thus given by:

(2)

By assumption, a proportion  of the *p*1 cases that have been HIV positive for longer than *T* still test recent by BED at time *T*. A better estimate of the number of cases who seroconverted in time *T* prior to the survey is thus given by:

(3)

and this, in turn, gives an improved estimate () of the number who have been HIV positive for longer than time *T*. Given the above fixed parameters *P*, *N*, *R*, ** and *T*, define the pairs of sequences (*pi*), (*ri*) for *i* = 1, 2 … by and with and . Successive estimates of the incidence are thus given by *JT*(*i*) (*i* = 1, 2, 3 …) where

Since , the sequence (*JT*(*i*)) converges if (*ri*) does. Now, for any *k* = 1, 2 …

Write. Consider (3) for *k* and (*k*-1) and subtract to obtain, with:

So, for any *k* = 1, 2, ….

Thus

and

As noted above, is the adjusted *risk* of infection over time *T*. Authors often prefer to estimate incidence as an averaged *rate* (*I*) over time *T*, and best estimated for the situation where  = 0 by:

When  > 0 we replace *R* with to get:

where and now has the dimension of time.
